# Supplementary material
Source: publisher figshare collection journal article supplement (https://tandf.figshare.com/articles/dataset/_/12095229)
Supplement: Supplementary file 1 [file 1]

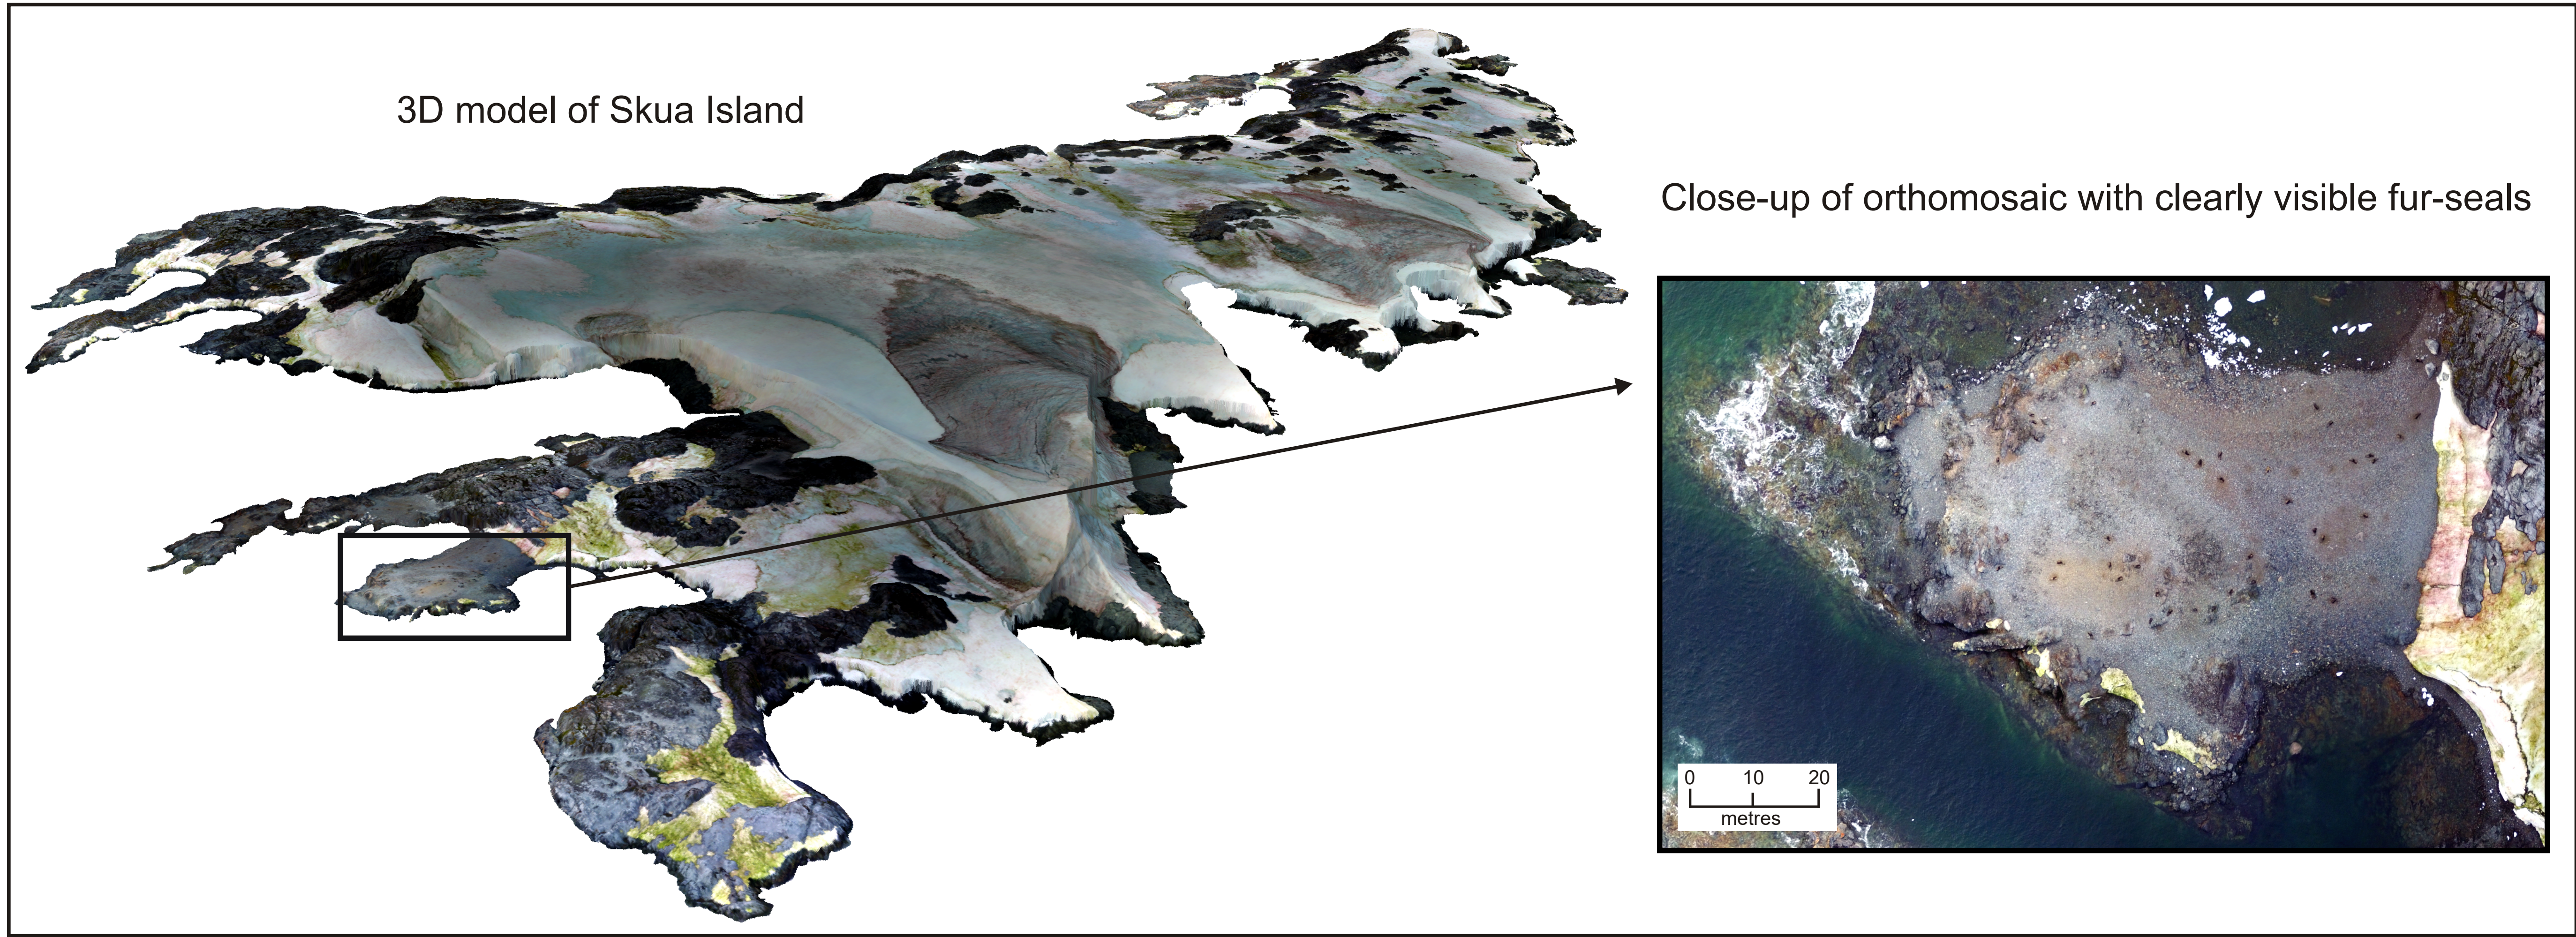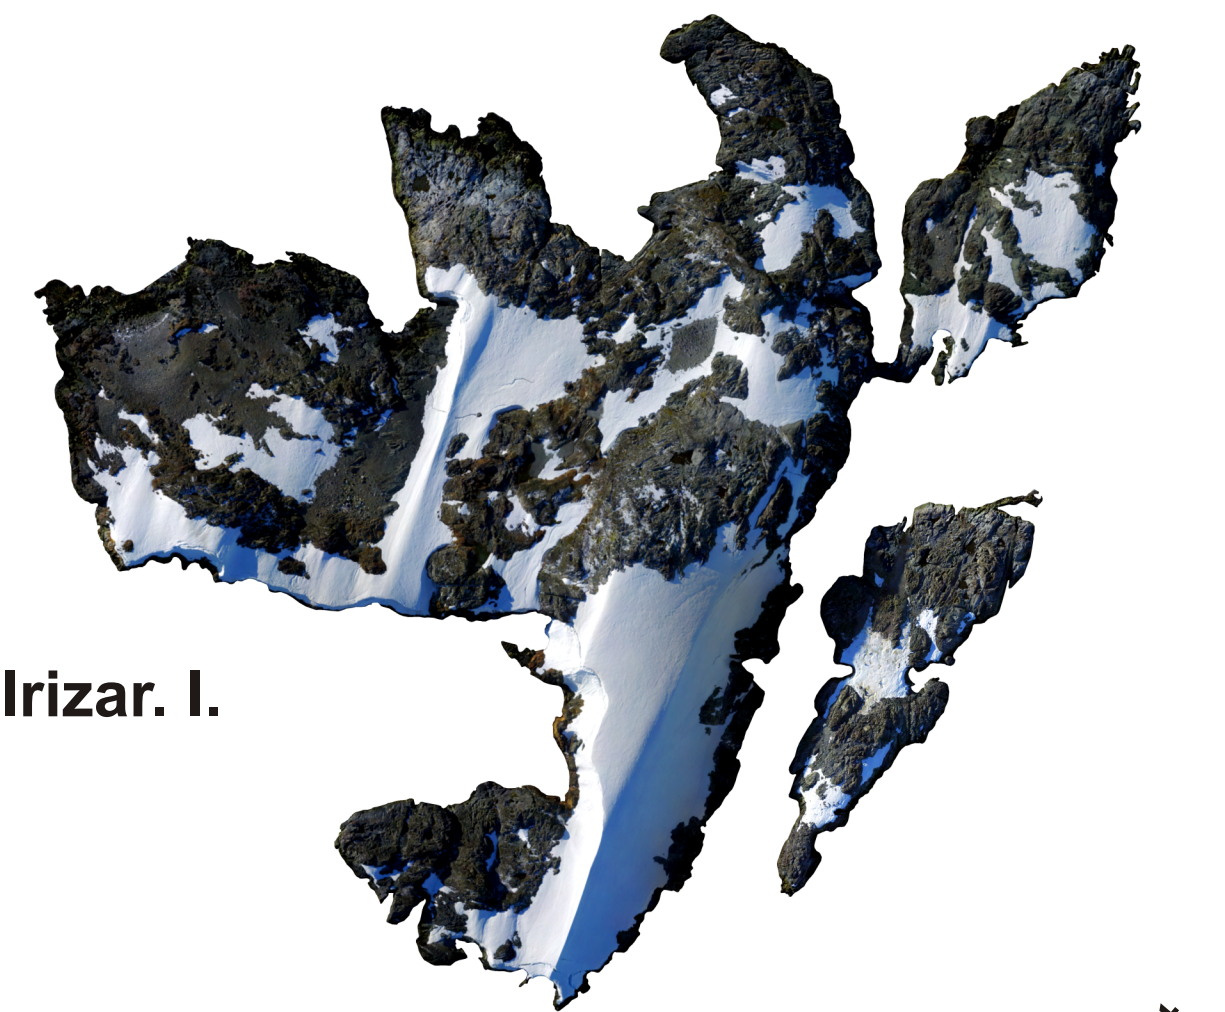

Penola Strait

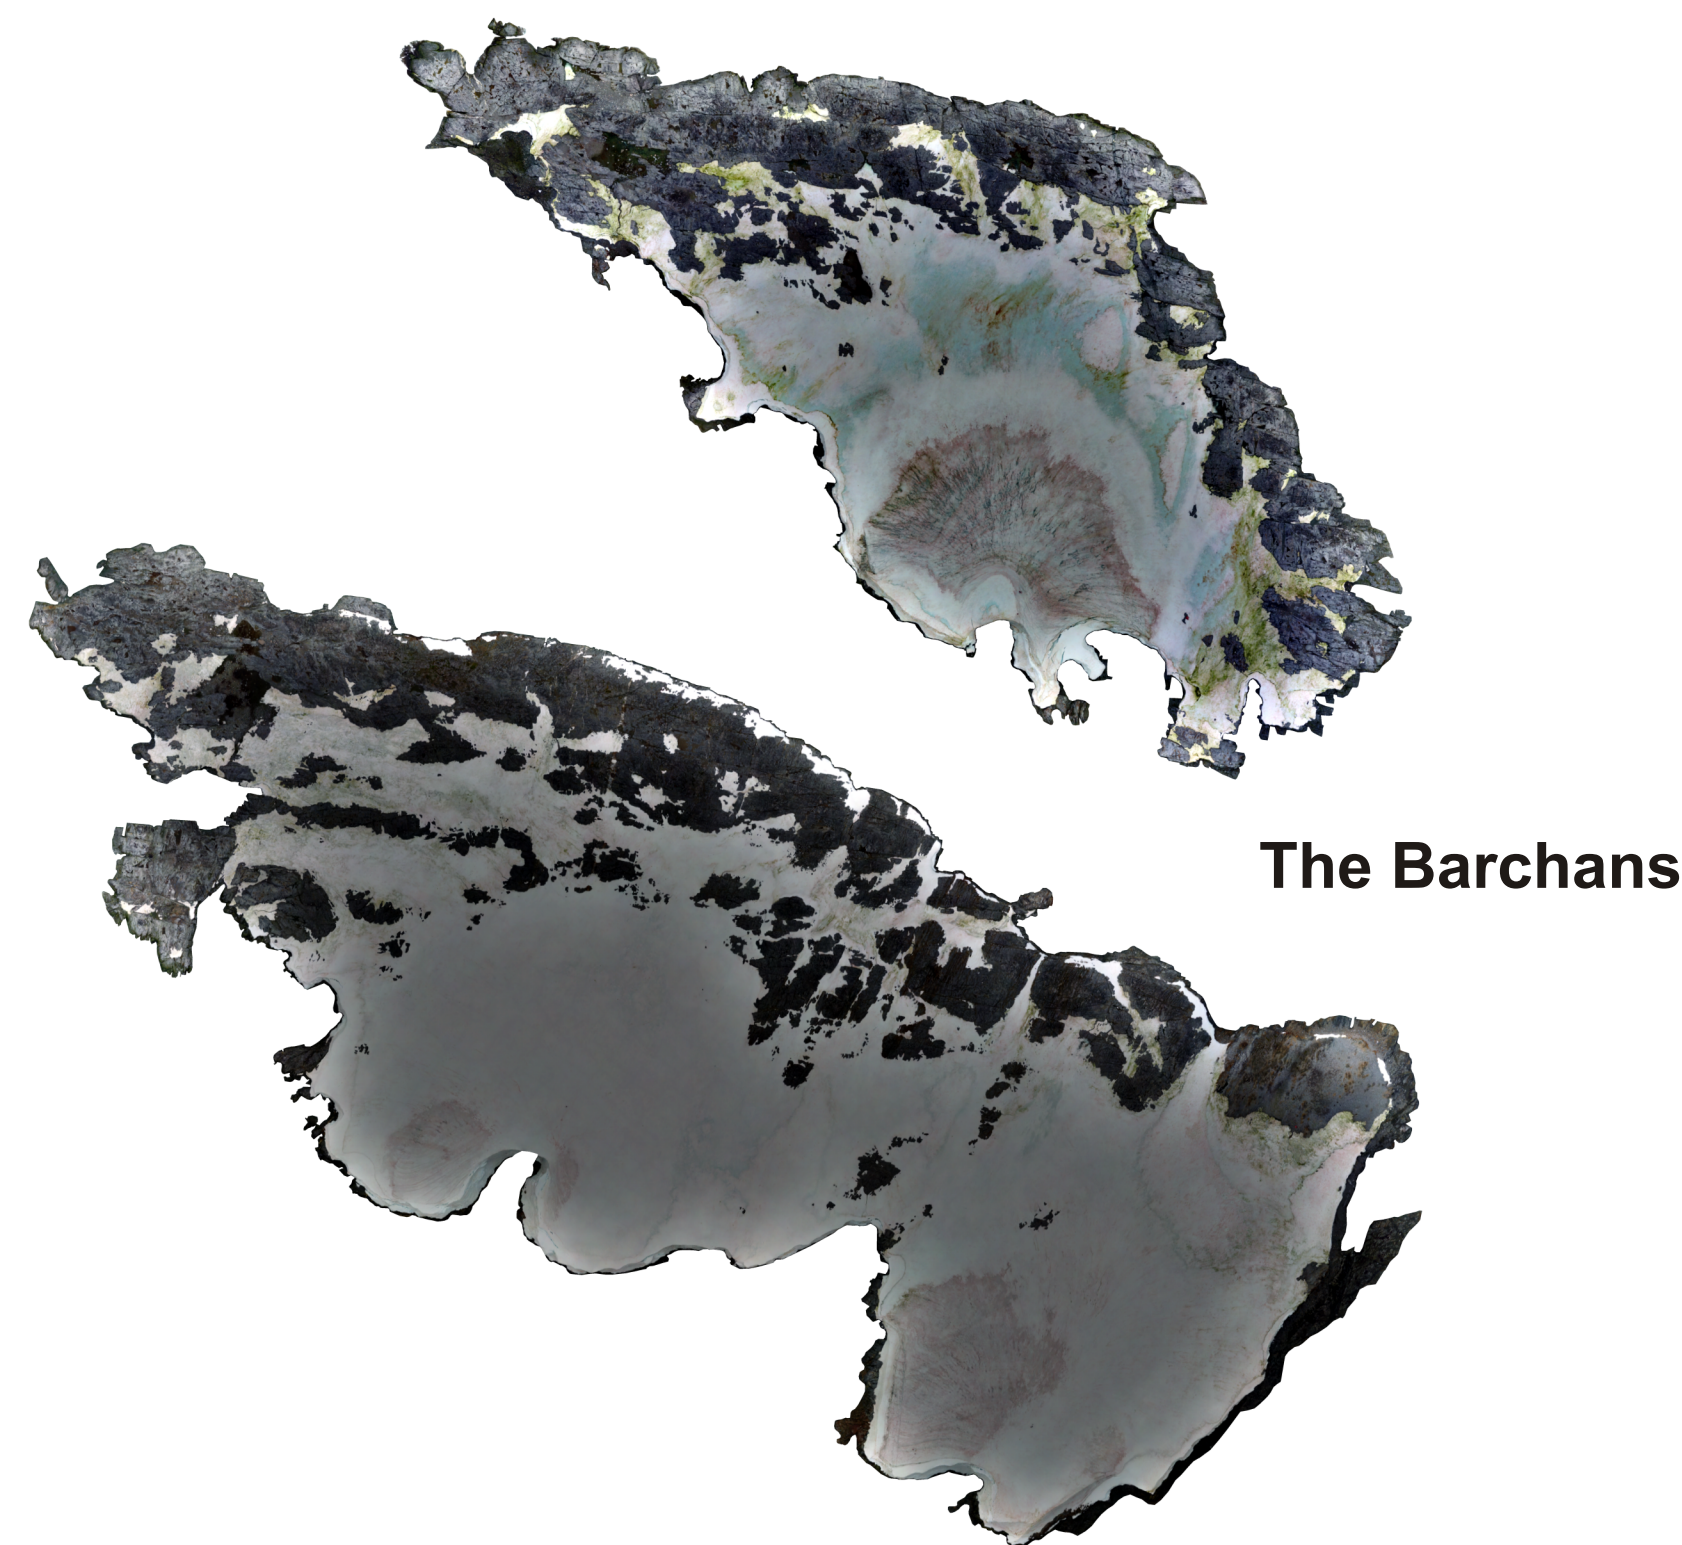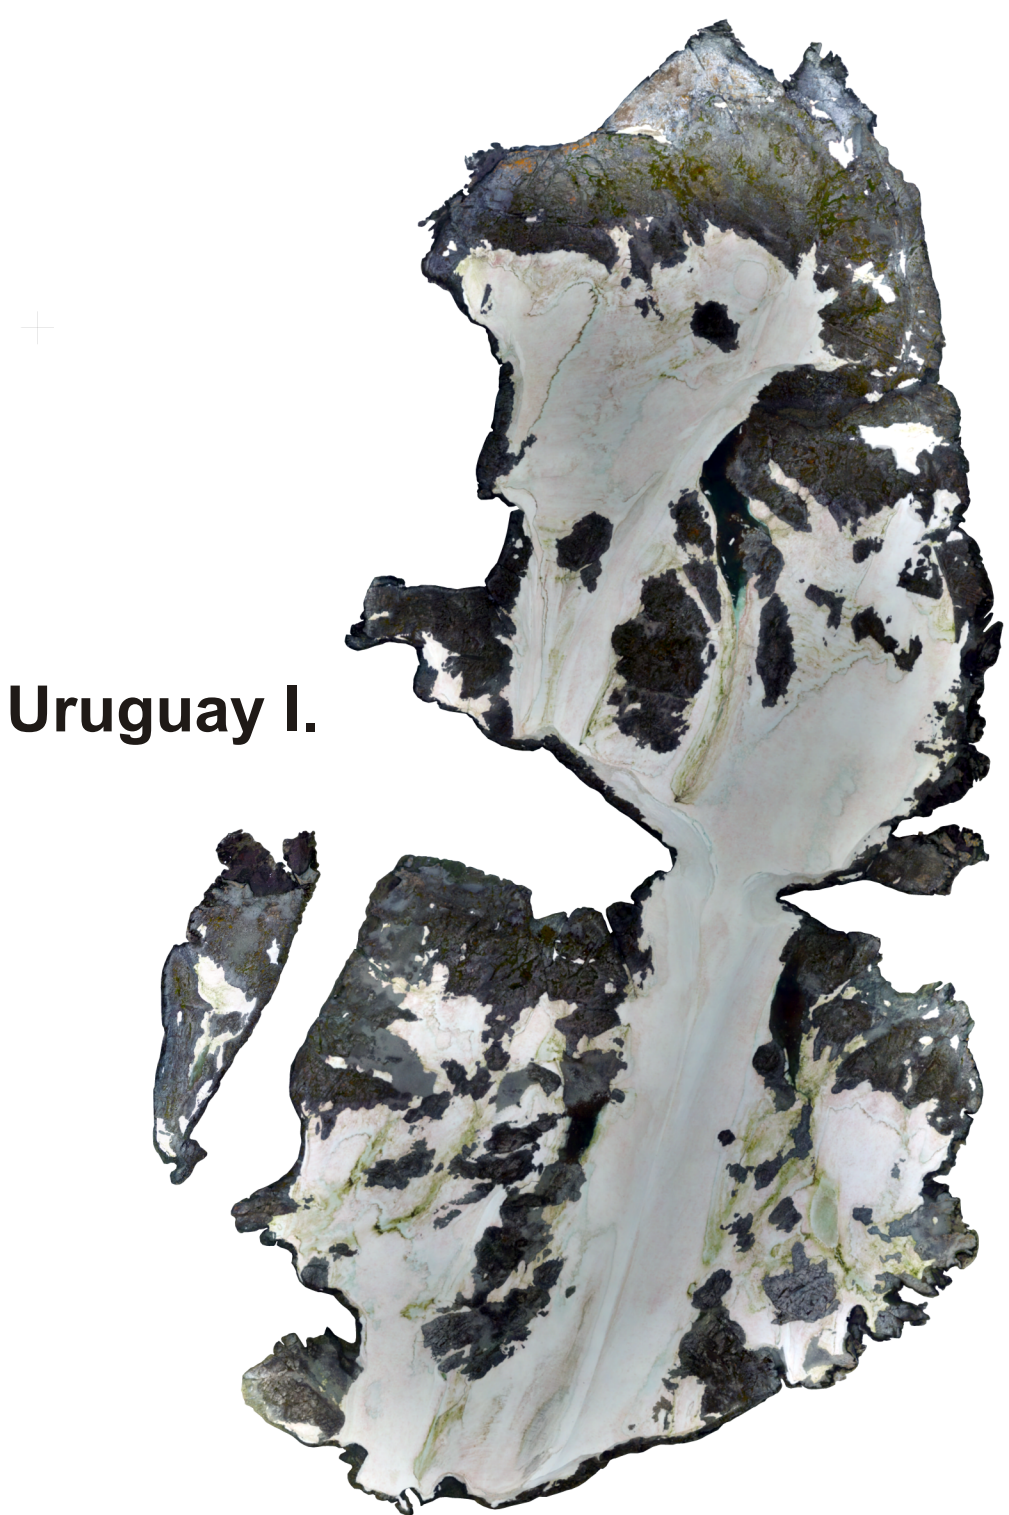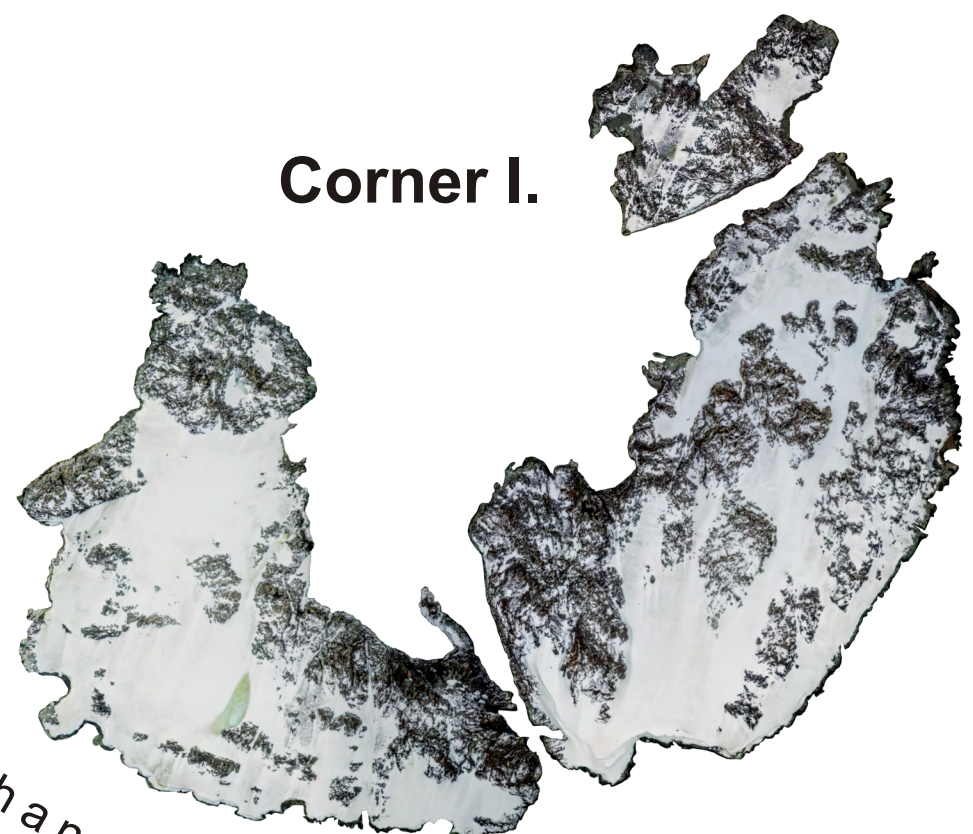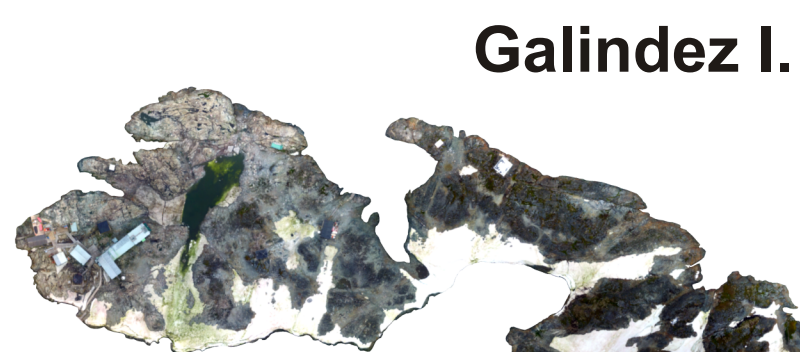

Winter I.

Meek Channel

Skua Creek

Skua I.

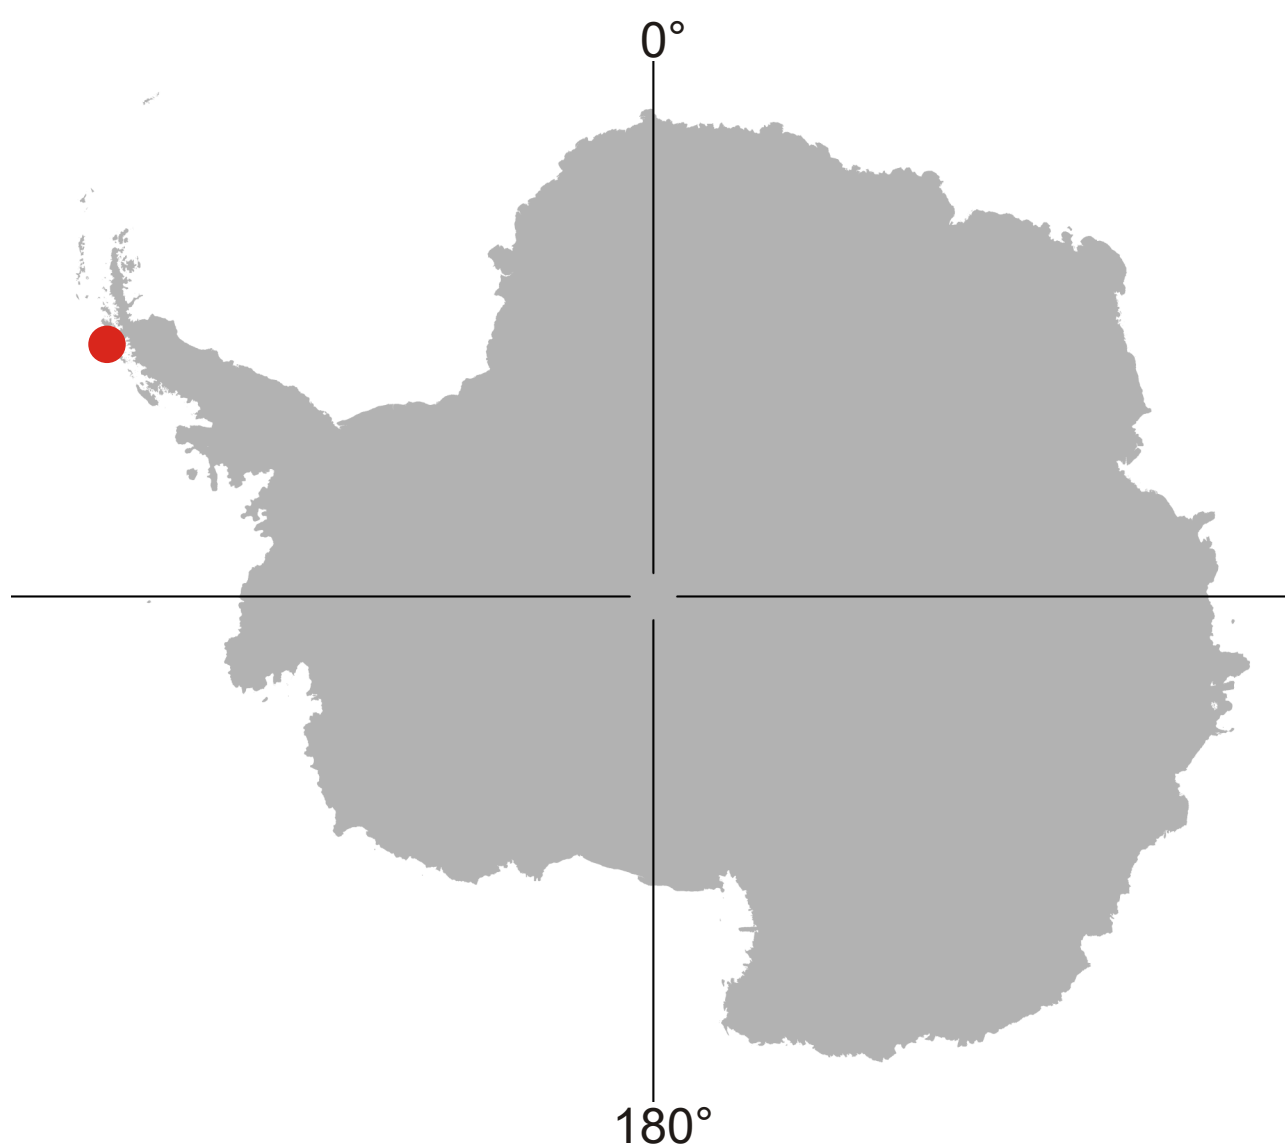

# Orthophoto map of the largest Argentine Islands, West Antarctica

Lamsters, K., Karušs, J., Krievāns, M., Ješkins, J.

University of Latvia, Riga, Latvia

Projection: UTM, zone 20S  
Datum: WGS 84  
Grid: Geographic Coordinate System  
1:5500 at print scale  
Map based on UAV imagery  
captured on February and March, 2018

Location map sources:  
SCAR Antarctic Digital Database  
Sentinel-2A image (2016.02.10.),  
copyright of European Space Agency

© Journal of Maps, 2019

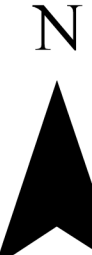

0 0,5 1  
kilometres
