# Supplementary material
Source: publisher figshare collection journal article supplement (https://tandf.figshare.com/articles/dataset/_/12095229)
Supplement: Supplementary file 2 [file 1]

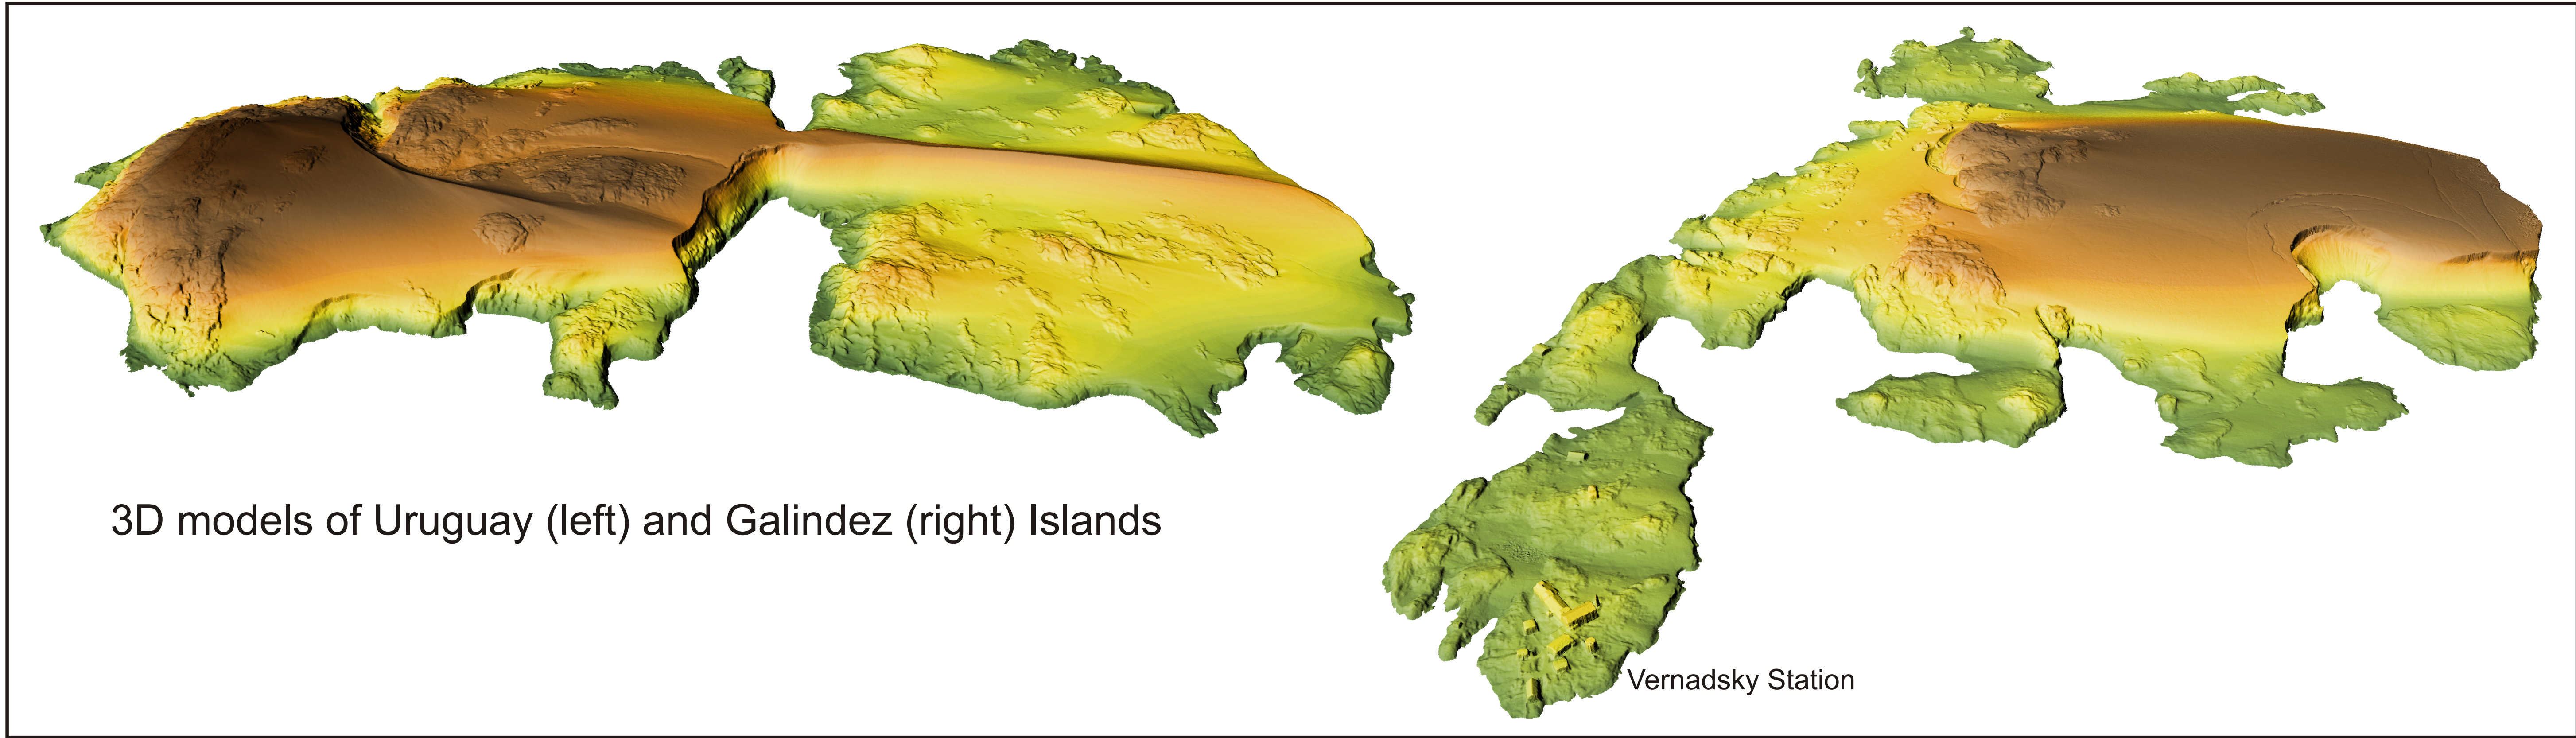

3D models of Uruguay (left) and Galindez (right) Islands

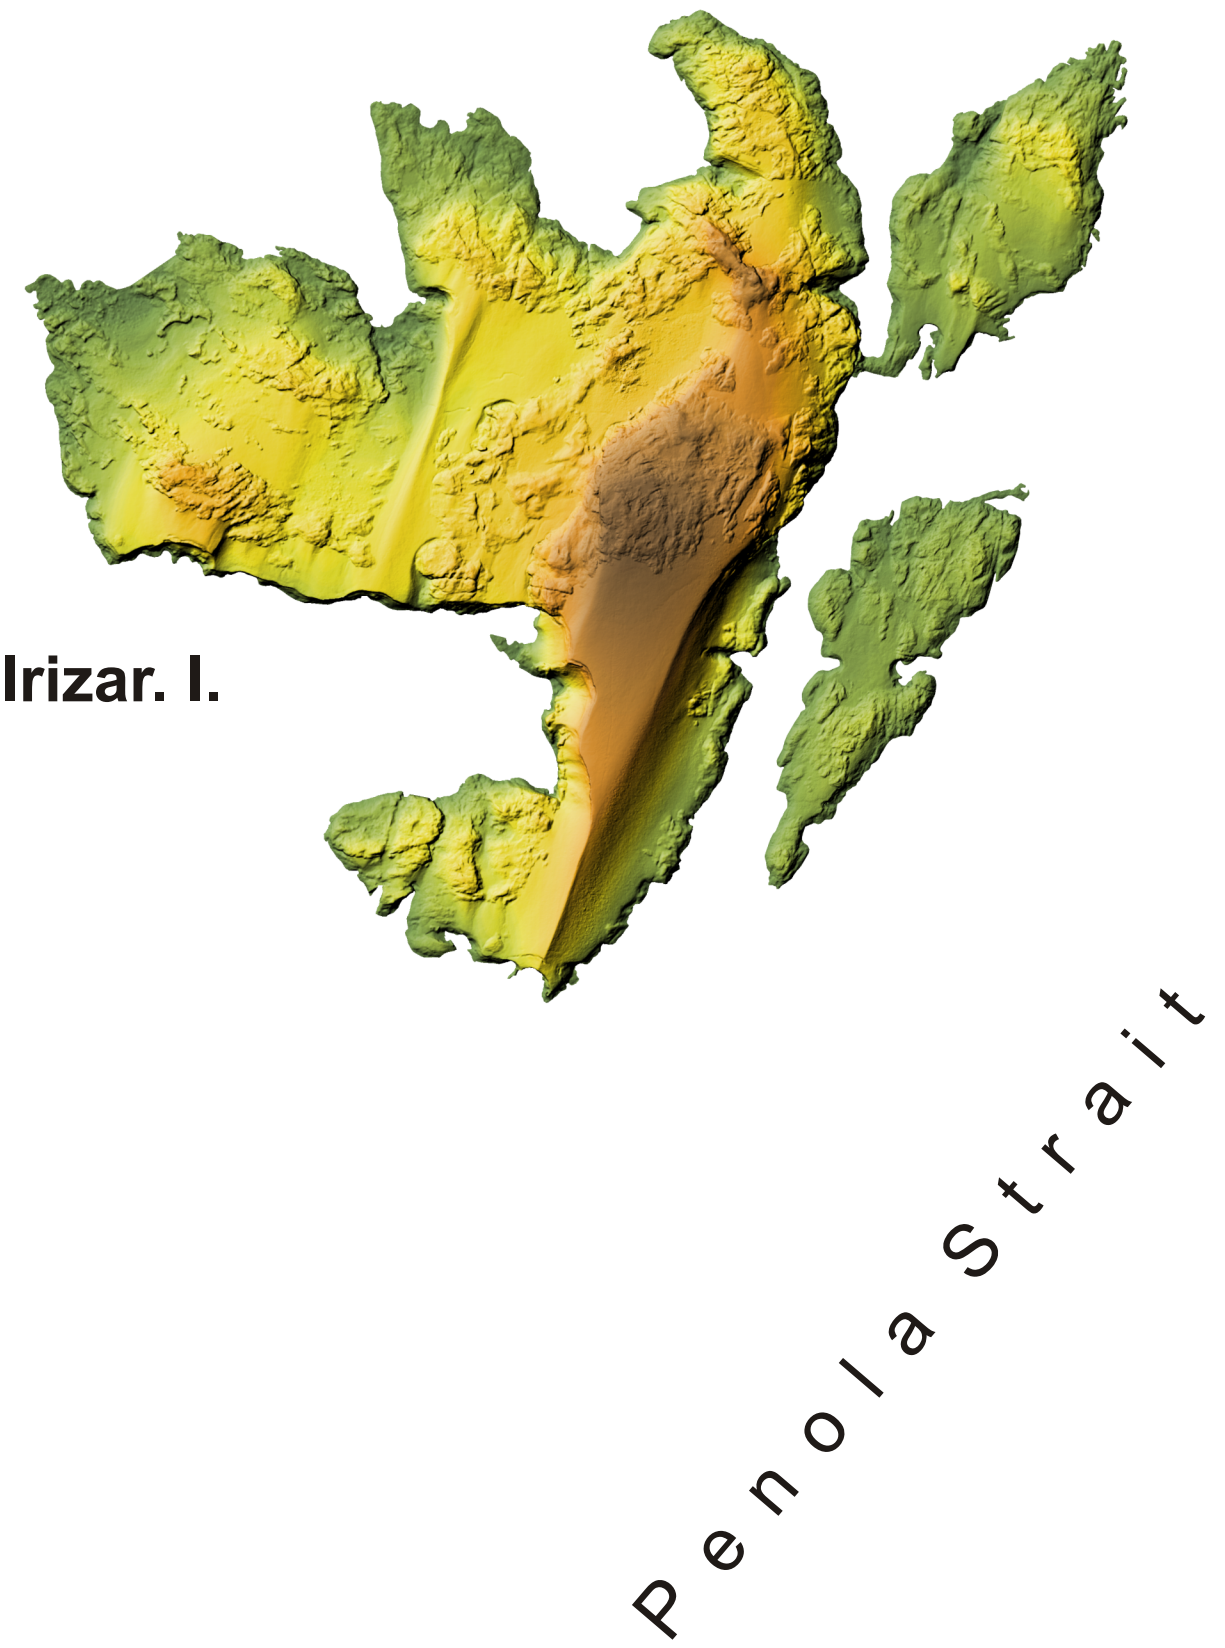

Irizar. I.

Penola Strait

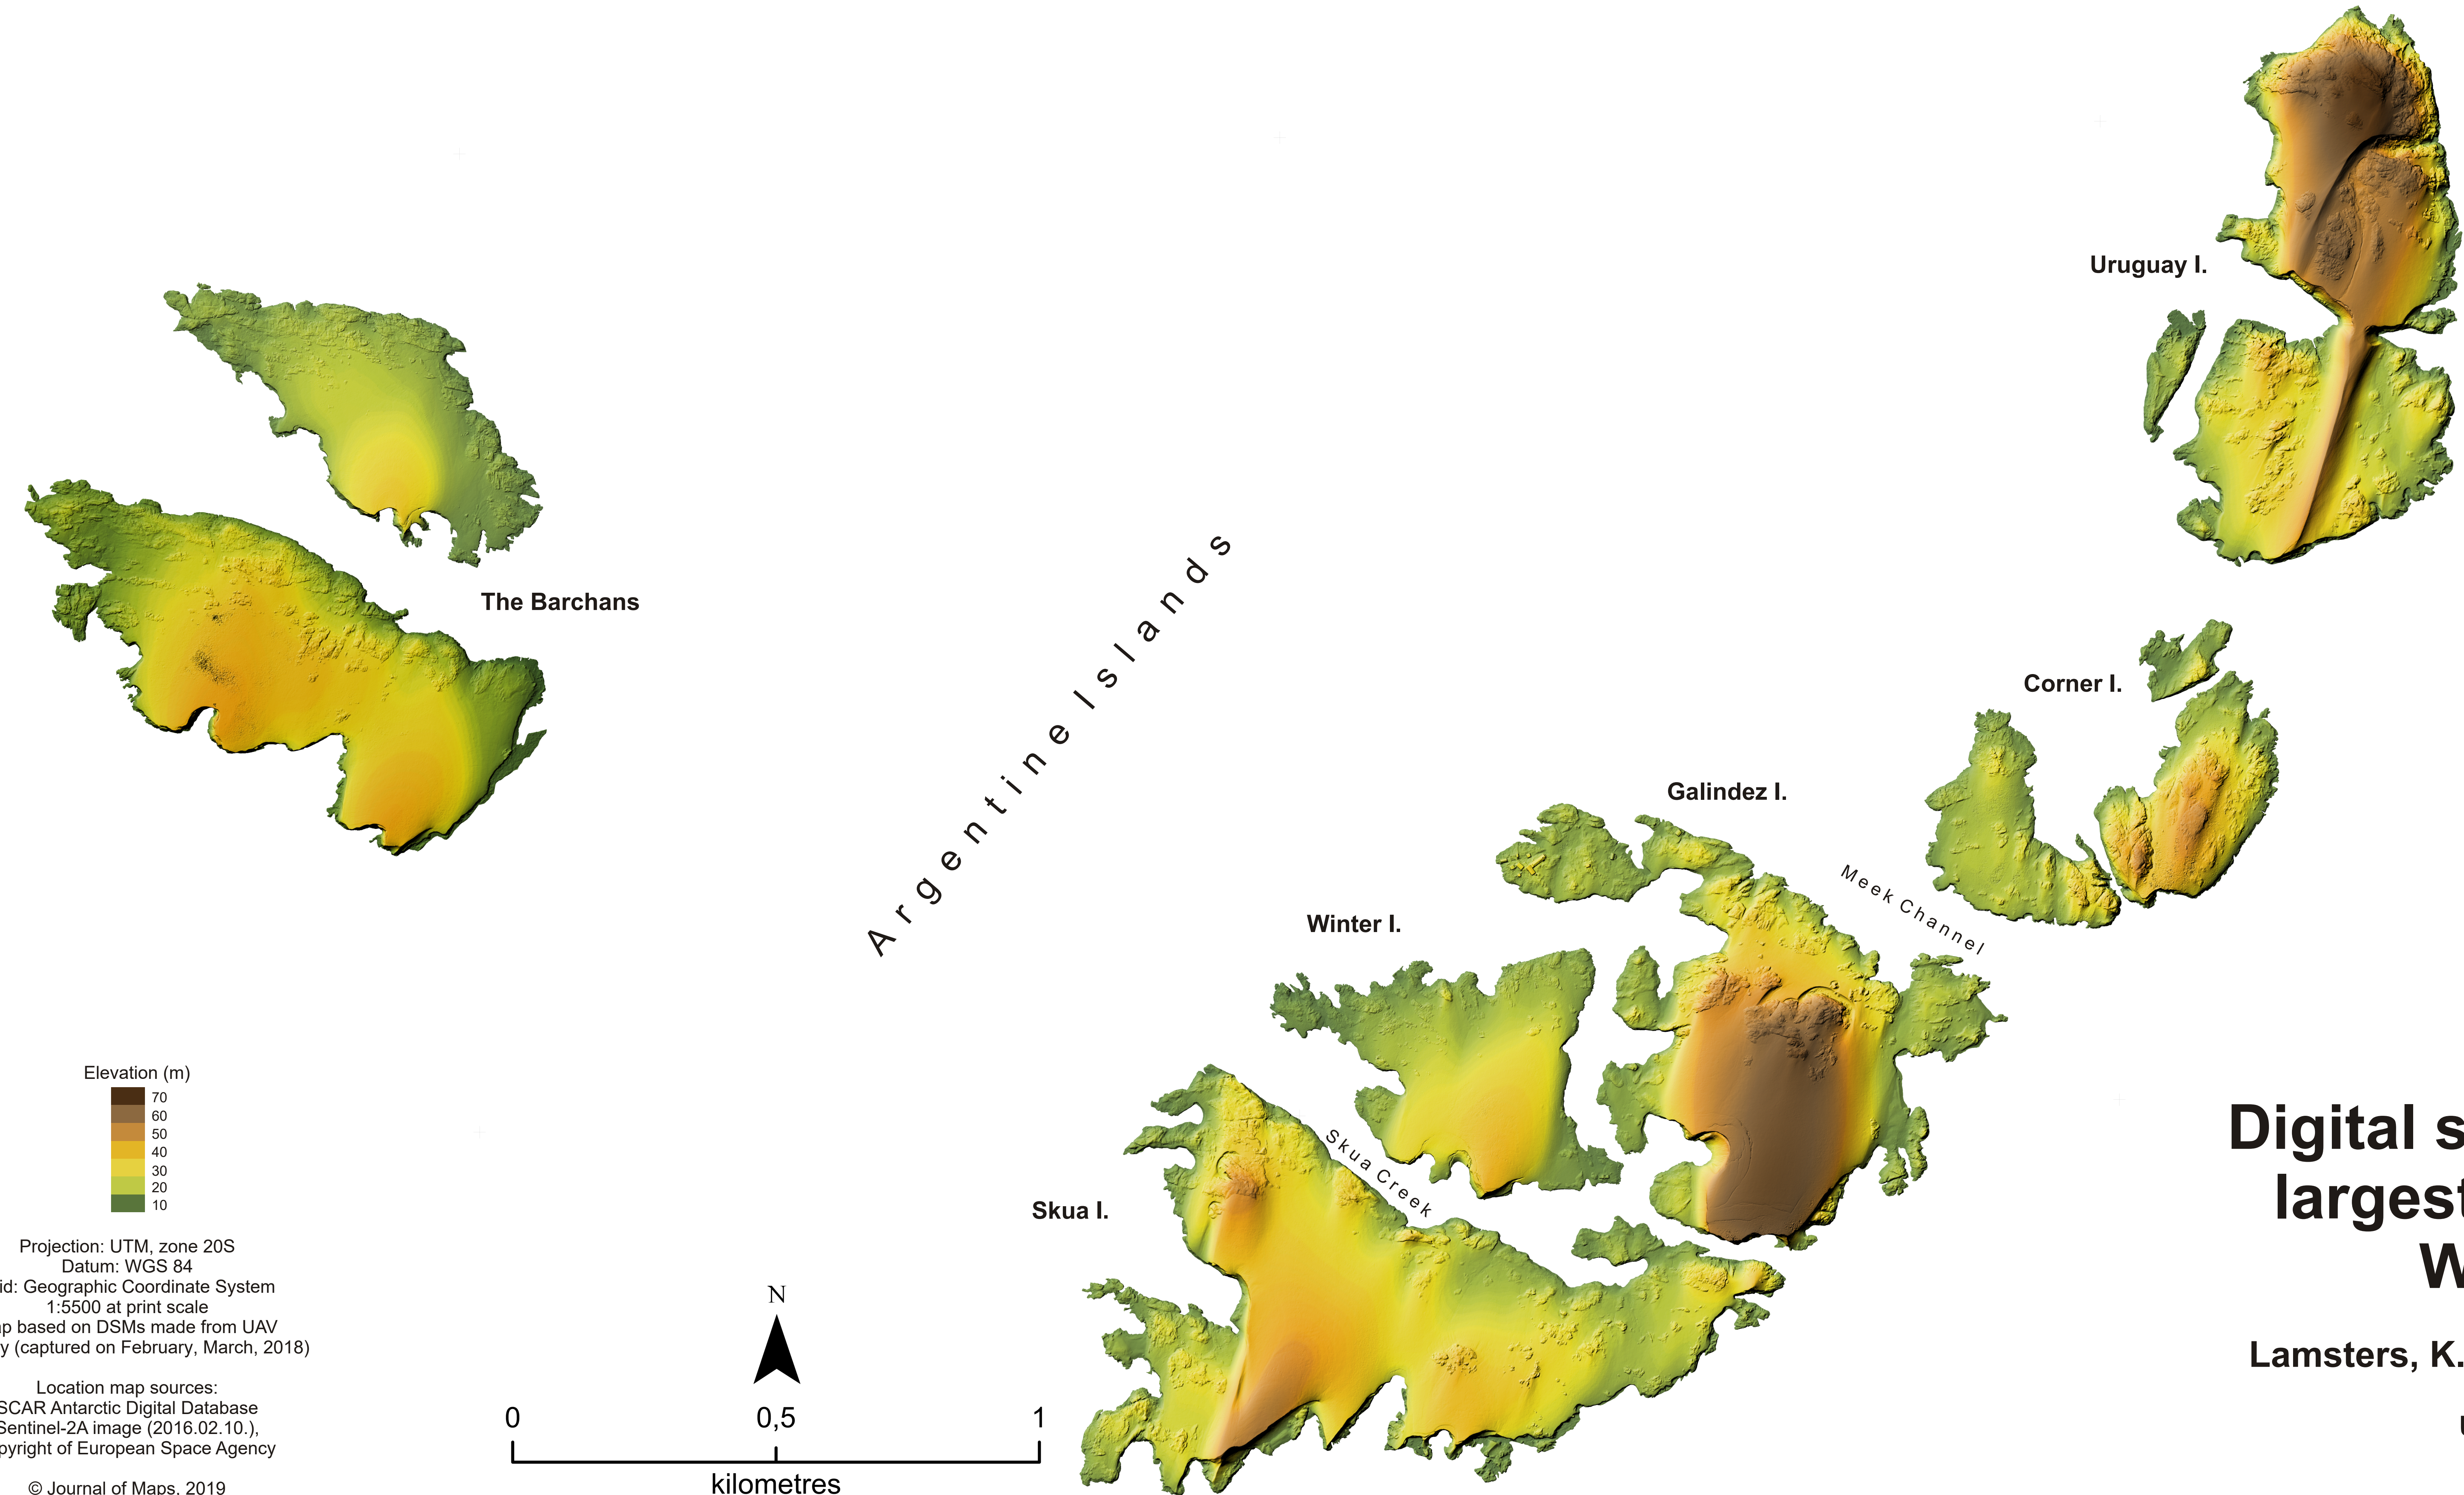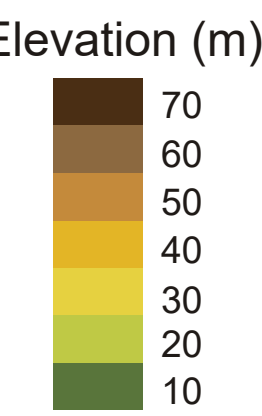

Projection: UTM, zone 20S  
Datum: WGS 84  
Grid: Geographic Coordinate System  
1:5500 at print scale  
Map based on DSMs made from UAV  
imagery (captured on February, March, 2018)

Location map sources:  
SCAR Antarctic Digital Database  
Sentinel-2A image (2016.02.10.),  
copyright of European Space Agency

© Journal of Maps, 2019

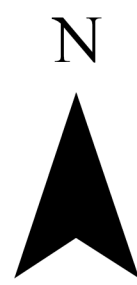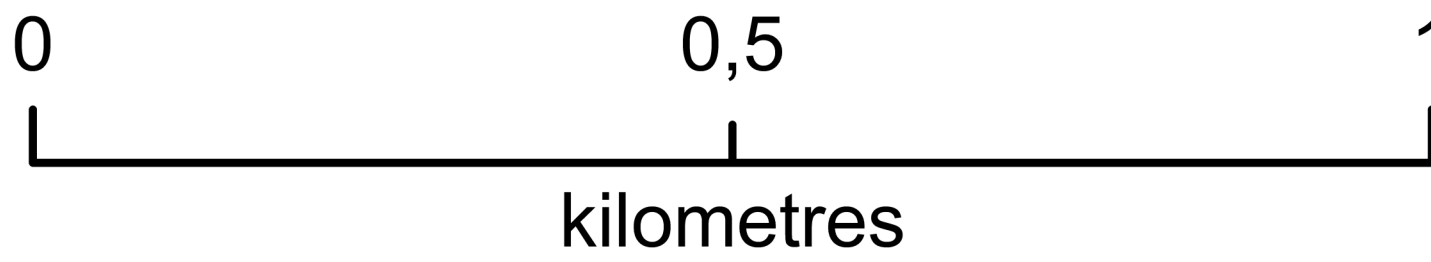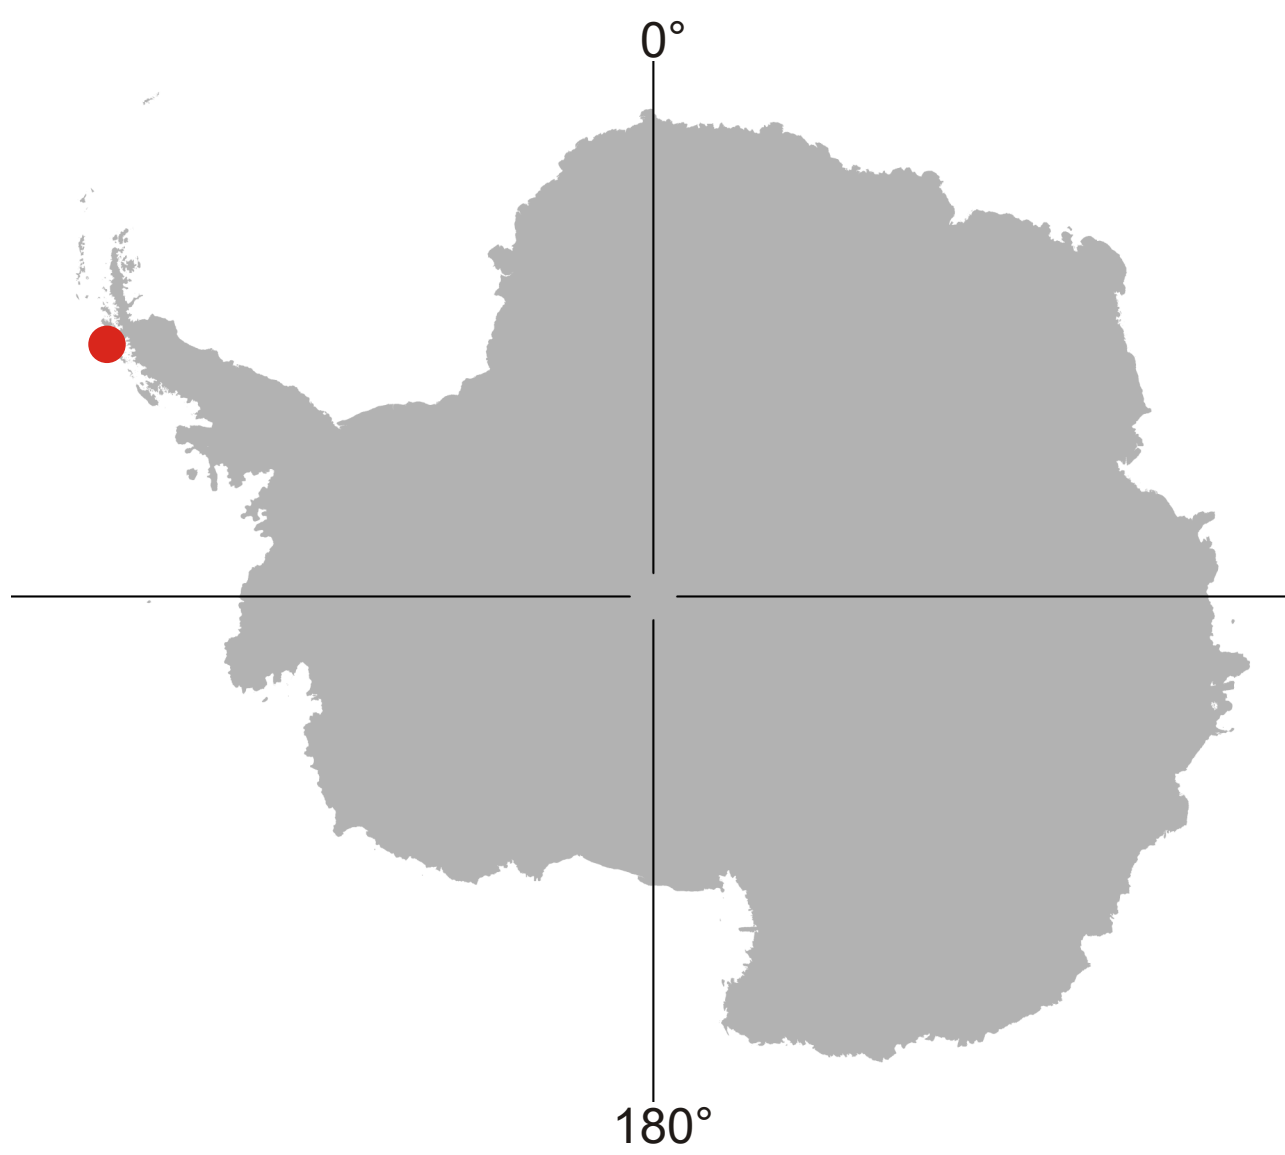

# Digital surface models of the largest Argentine Islands, West Antarctica

Lamsters, K., Karušs, J., Krievāns, M., Ješkins, J.

University of Latvia, Riga, Latvia
